# Supplementary material
Source: Elsevier journal article supplement (https://www.sciencedirect.com/science/article/pii/S1885585724002470)
Supplement: mmc1 [file mmc1.pdf]

**SUPPLEMENTARY DATA**

**Table 1 of the supplementary data**

Contraindication to long term oral anticoagulation (OAC)

|                              |                                                                                                                                                                                                                                                                                                      |
|------------------------------|------------------------------------------------------------------------------------------------------------------------------------------------------------------------------------------------------------------------------------------------------------------------------------------------------|
| Absolute<br>contraindication | <ul style="list-style-type: none"><li>- Severe uncorrectable anemia (eg, thalassemia)</li><li>- Prior life-threatening bleeding</li><li>- Multiple significant falls</li><li>- Prior ICB or OAC</li><li>- Prior SAH – known cerebral aneurysm</li><li>- Untreatable HHT</li></ul>                    |
| Relative<br>contraindication | <ul style="list-style-type: none"><li>- Noncompliance with OAC</li><li>- Malignancy</li><li>- Chronic end-stage renal disease</li><li>- Amyloid</li><li>- Chronic bacterial endocarditis</li><li>- High-risk occupation (eg, active duty military, fireman)</li><li>- Failure of prior OAC</li></ul> |

HHT, hereditary hemorrhagic telangiectasia; ICH, intracerebral bleeding; SAH, subarachnoid bleeding.

**Table 2 of the supplementary data**

Baseline, Procedural Characteristics, and In-Hospital Outcomes, Overall and According to Early and Late Readmissions Following LAAC

| Variables                                                           | Early readmission (n = 46) | Late readmission (n = 211) | P     |
|---------------------------------------------------------------------|----------------------------|----------------------------|-------|
| <b>Baseline characteristics</b>                                     |                            |                            |       |
| <i>Age, y</i>                                                       | 78.4 ± 9.1                 | 77.0 ± 7.7                 | .013  |
| <i>Female sex</i>                                                   | 15 (32.6)                  | 69 (32.7)                  | .321  |
| <i>BMI, kg/m<sup>2</sup></i>                                        | 26.3 ± 4.3                 | 26.7 ± 4.8                 | .028  |
| <i>Hypertension</i>                                                 | 41 (89.1)                  | 190 (90.1)                 | .273  |
| <i>Diabetes mellitus</i>                                            | 17 (36.9)                  | 91 (43.1)                  | .008  |
| <i>Current smoking</i>                                              | 9 (19.6)                   | 42 (20.2)                  | .153  |
| <i>Chronic renal disease, eGFR &lt; 60 mL/min/1.73m<sup>2</sup></i> | 18 (39.1)                  | 113 (53.6)                 | <.001 |
| <i>Type of atrial arrhythmia</i>                                    |                            |                            |       |
| Paroxysmal                                                          | 2 (4.4)                    | 18 (8.5)                   | .470  |
| Chronic                                                             | 25 (54.4)                  | 124 (58.8)                 |       |
| <i>Previous cerebral events</i>                                     |                            |                            |       |
| Ischemic stroke                                                     | 10 (21.7)                  | 72 (34.1)                  | .071  |
| Hemorrhagic stroke                                                  | 6 (13.0)                   | 41 (19.4)                  | .003  |
| TIA                                                                 | 1 (2.2)                    | 17 (8.1)                   | .371  |
| <i>Coronary artery disease</i>                                      | 20 (43.5)                  | 76 (36.0)                  | .207  |
| <i>Peripheral artery disease</i>                                    | 14 (30.4)                  | 67 (31.8)                  | .007  |
| <i>Heart failure</i>                                                | 11 (23.9)                  | 85 (40.3)                  | <.001 |
| <i>Previous bleeding</i>                                            | 41 (89.1)                  | 185 (87.7)                 | .098  |
| Previous gastrointestinal bleeding                                  | 29 (63.0)                  | 99 (48.3)                  | <.001 |
| Previous Intracranial bleeding                                      | 8 (17.4)                   | 50 (24.4)                  | <.001 |
| <i>Oral anticoagulation contraindication</i>                        |                            |                            |       |
| None                                                                | 7 (15.2)                   | 21 (9.9)                   | .009  |
| Relative                                                            | 15 (32.6)                  | 80 (37.9)                  |       |
| Absolute                                                            | 24 (52.2)                  | 110 (52.1)                 |       |
| <i>CHA<sub>2</sub>DS<sub>2</sub>-VASc</i>                           | 4.22 ± 1.19                | 4.62 ± 1.41                | .015  |
| <i>HAS-BLED</i>                                                     | 3.72 ± 0.86                | 4.00 ± 1.01                | <.001 |
| <i>Antithrombotic treatment at discharge</i>                        |                            |                            |       |
| SAPT                                                                | 13 (28.3)                  | 56 (26.5)                  | .969  |

|                                   |           |            |      |
|-----------------------------------|-----------|------------|------|
| <i>DAPT</i>                       | 27 (58.7) | 98 (46.5)  | .005 |
| <i>OAC</i>                        | 6 (13.0)  | 51 (24.2)  | .009 |
| <i>OAC + SAPT</i>                 | 0 (0)     | 4 (1.9)    | .021 |
| <b>Procedural characteristics</b> |           |            |      |
| <i>Prosthesis type</i>            |           |            |      |
| Amplatz (cardiac plug or amulet)  | 30 (65.2) | 149 (70.6) | .716 |
| Watchman (FLX or 2.5)             | 13 (28.3) | 52 (24.6)  |      |
| Other                             | 3 (6.5)   | 10 (4.7)   |      |
| <i>Procedural success</i>         | 46 (100)  | 211 (100)  | .706 |
| <i>Complete occlusion</i>         | 45 (97.8) | 195 (92.9) | .457 |
| <i>Prosthesis embolization</i>    | 1 (2.2)   | 1 (0.5)    | .007 |

BMI, body mass index; TIA, transient ischemic attack; SAPT, single antiplatelet therapy; DAPT, dual antiplatelet therapy; OAC, oral anticoagulant.

The data are expressed as No. (%) or mean  $\pm$  standard deviation.
